# Supplementary material for: The transformation of the forest steppe in the lower Danube Plain of southeastern Europe: 6000 years of vegetation and land use dynamics
Source: Copernicus journal article supplement (doi:10.5194/bg-18-1081-2021), 2021-02-15

Supplement of Biogeosciences, 18, 1081–1103, 2021  
<https://doi.org/10.5194/bg-18-1081-2021-supplement>  
© Author(s) 2021. This work is distributed under  
the Creative Commons Attribution 4.0 License.

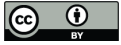

*Supplement of*

## **The transformation of the forest steppe in the lower Danube Plain of southeastern Europe: 6000 years of vegetation and land use dynamics**

**Angelica Feurdean et al.**

*Correspondence to:* Angelica Feurdean ([angelica.feurdean@gmail.com](mailto:angelica.feurdean@gmail.com), [feurdean@em.uni-frankfurt.de](mailto:feurdean@em.uni-frankfurt.de))

The copyright of individual parts of the supplement might differ from the CC BY 4.0 License.

**Supplement S1.** Location of the study area (insert) and the distribution of surface sample sites used for the pollen-based calibration of the vegetation cover shown in the CORINE Land Cover (CLC) map from 2012. Source: CORINE land cover 2012 (CLC2012). For details see Grindean et al., 2019.

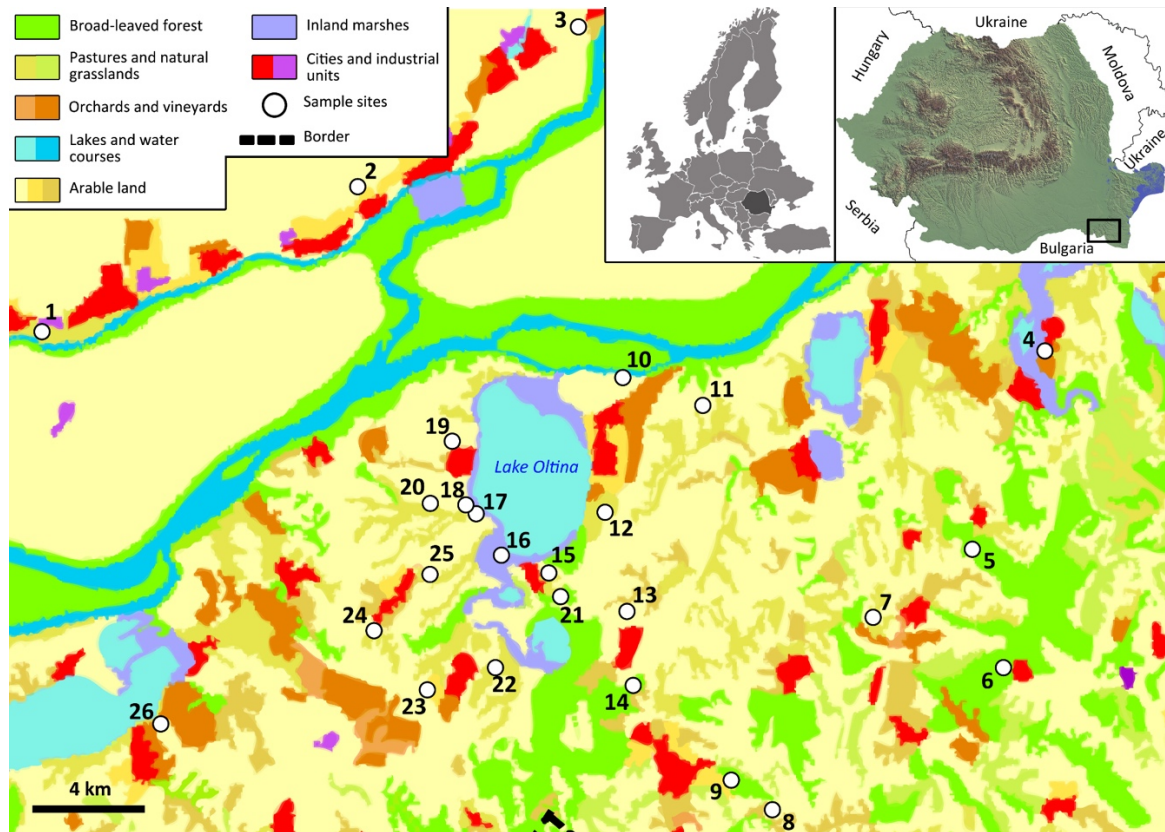

Supplement: Supplementary file 1 [file bg-18-1081-2021-supplement.pdf]
